# Supplementary material for: Magnetic nanoparticle-supported DABCO tribromide: a versatile nanocatalyst for the synthesis of quinazolinones and benzimidazoles and protection/deprotection of hydroxyl groups
Source: Royal Society of Chemistry journal article supplement (doi:10.1039/c7nj00479f), 2017-01-01
Supplement: c7nj00479f1.pdf [file c7nj00479f1.pdf]

## **New Journal of Chemistry**

### **Supporting Information**

#### **Magnetic nanoparticles-supported DABCO tribromide: a versatile nanocatalyst for the synthesis of quinazolinones and benzimidazoles and protection/deprotection of hydroxyl groups**

Amin Rostami\*, Omid Pourshiani, Yahya Navasi, Neda Darvishi, and Shaghayegh Saadati

## Figures

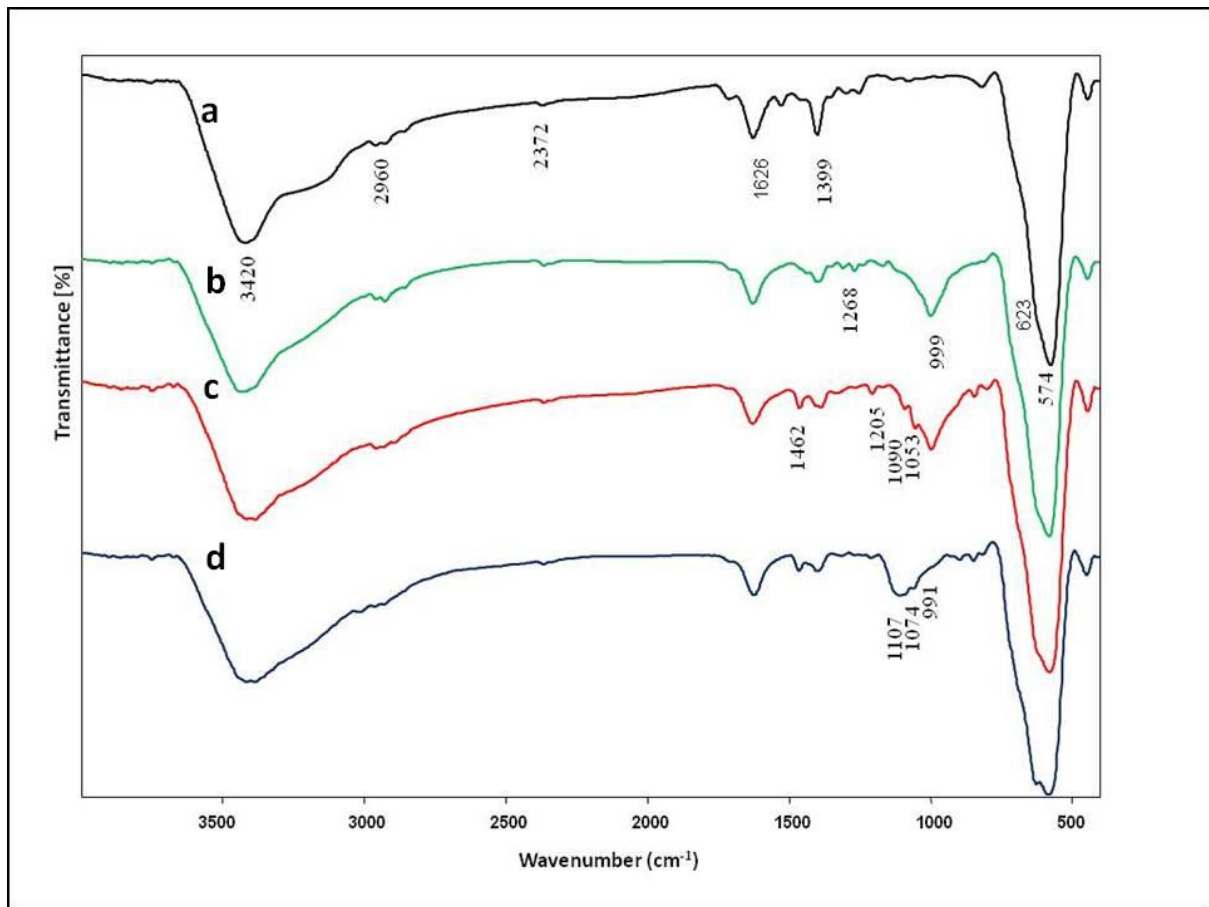

**Fig. S1.** FTIR spectra of MNPs (a), MNPs-CPTMS (b), MNPs-DABCO (c) and MNPs-DABCO tribromide (d)

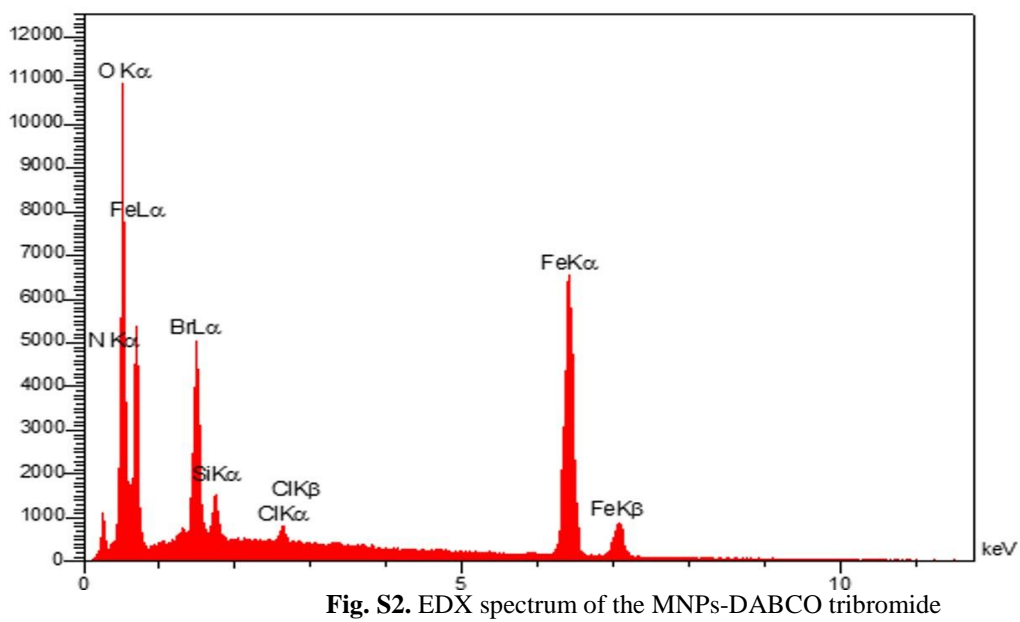

**Fig. S2.** EDX spectrum of the MNPs-DABCO tribromide

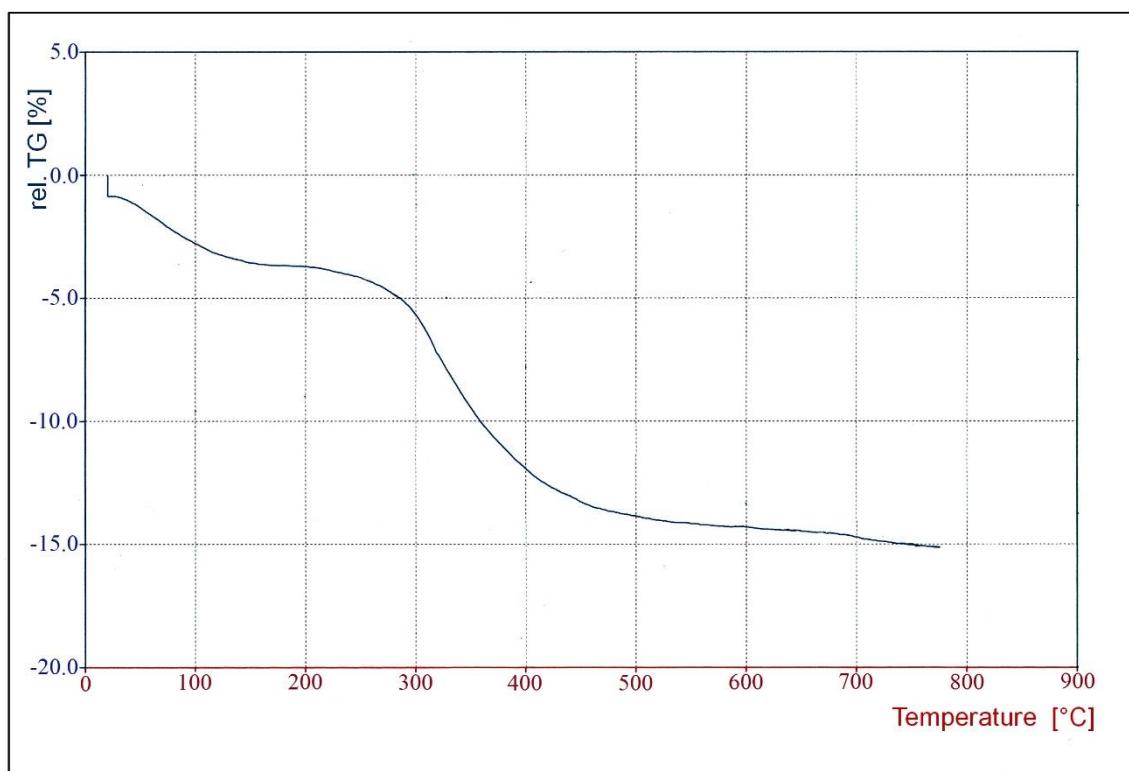

**Fig. S3.** TGA profile of the MNPs-DABCO tribromide

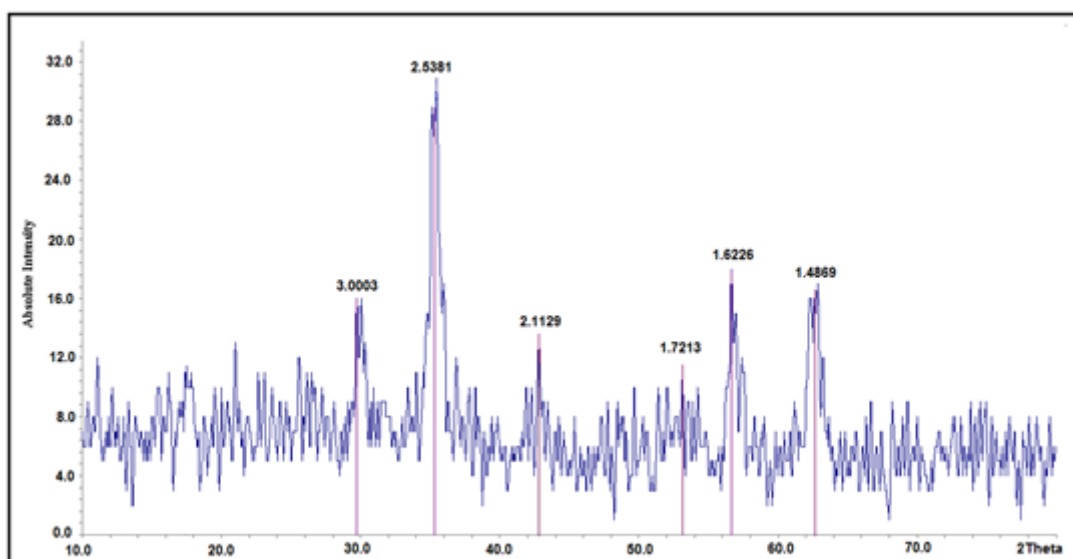

**Fig. S4.** XRD pattern of the MNPs-DABCO tribromide

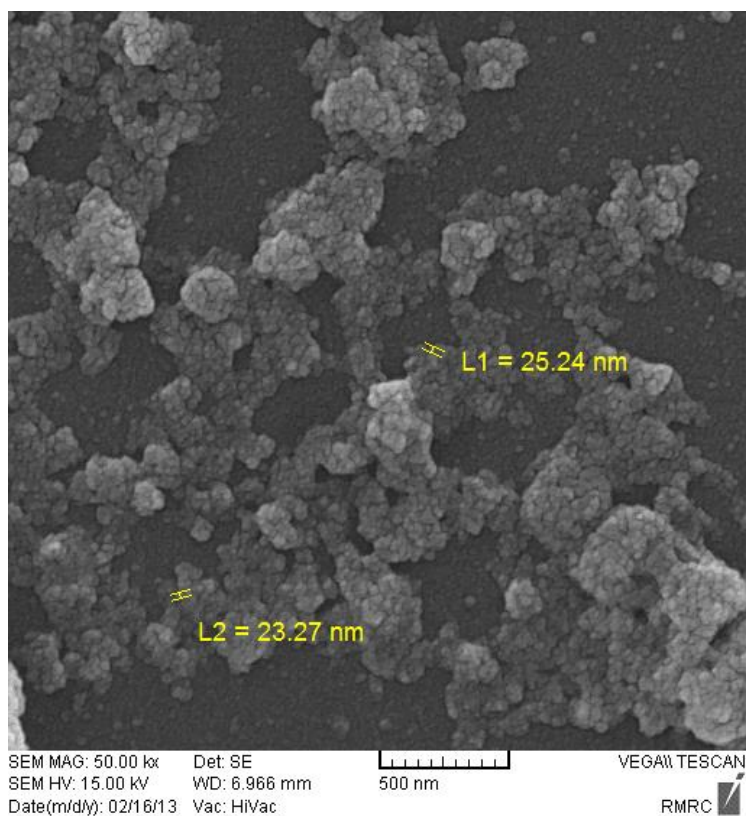

**Fig. S5.** SEM image of the MNPs-DABCO tribromide

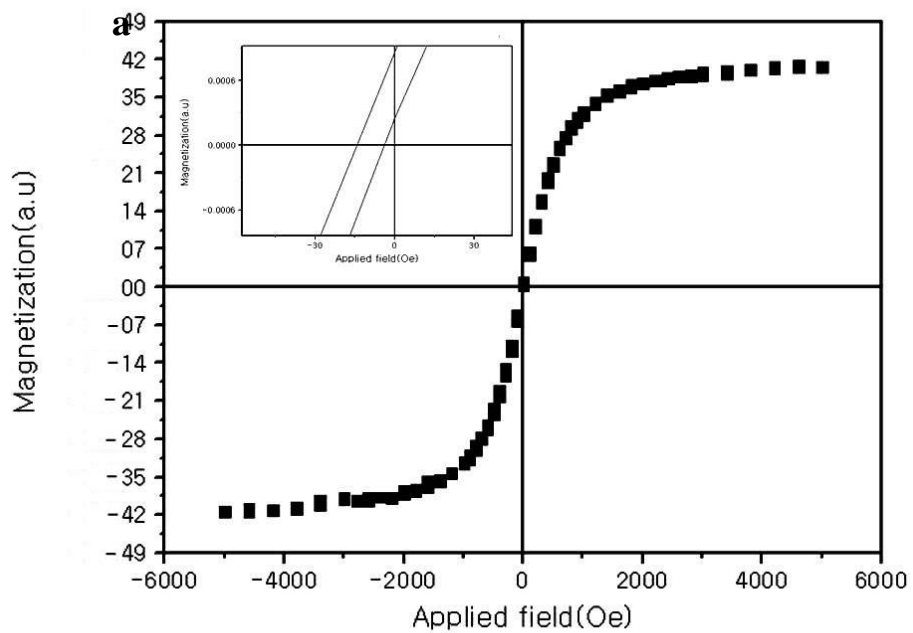

**Fig. S6.** Magnetization curve for MNPs-DABCO tribromide at room temperature (Left inset: the magnified field from -30 to 30 Oe)

## Selected spectra data

### **2-Phenylquinazolin-4(3H)-one (Table 2, entry 1)**

Mp 239-240 °C; IR (KBr) 3190 (NH), 1668 (C=O), 1600, 1427, 1369, 1234, 1108, 841, 710, 612 cm<sup>-1</sup>; <sup>1</sup>H NMR (400 MHz, CDCl<sub>3</sub>): δ (ppm) 7.10 (m, 1H, Ph), 7.42-7.63 (m, 2H, Ph), 7.72-7.78 (m, 2H, Ph), 8.11 (t, 2H, *J* = 8.0, Ph), 8.27 (d, 1H, *J* = 8.0 Hz, Ph), 10.80 (s, br, 1H, NH).

### **2-(2,3-Dichlorophenyl)quinazolin-4(3H)-one (Table 2, entry 3)**

Mp 229-231 °C; IR (KBr) 3200 (NH), 1674 (C=O), 1606, 1470, 1320, 1110, 960, 875, 806, 760, 687 cm<sup>-1</sup>; <sup>1</sup>H NMR (400 MHz, CDCl<sub>3</sub>): δ (ppm) 11.20 (s, br, 1H), 8.20 (d, *J* = 8.0 Hz, 1H, Ph), 7.94 (t, *J* = 8.0 Hz, 1H, Ph), 7.74 (d, *J* = 8.0 Hz, 1H), 7.49-7.56 (m, 4H).

### **4-(1H-benzo[d]imidazol-2-yl)-*N,N*-dimethylaniline (Table 4, entry 3)**

Mp 228-229 °C; IR (KBr) ν 3417 (NH), 2924 (C-H), 1620 (C=N) cm<sup>-1</sup>; <sup>1</sup>H NMR (400 MHz, CDCl<sub>3</sub>): δ (ppm): 3.32 (s, 6H), 5.48 (br, s, 1H, NH), 6.95 (d, *J* = 8.2 Hz, 2H, Ph), 7.3-7.84 (m, 6H, Ar).

### **2-(2,3-dichlorophenyl)-1H-benzo[d]imidazole (Table 4, entry 8)**

Mp 277-279 °C; IR (KBr) ν 3416 (NH), 1618 (C=N) cm<sup>-1</sup>; <sup>1</sup>H NMR (400 MHz, CDCl<sub>3</sub>): δ (ppm): 5.43 (br, s, 1H, NH), 6.62-7.1 (m, 3H, Ph), 7.7-8.00 (m, 4H, Ar).
